# Supplementary material for: Phenolic Compounds Content Evaluation of Lettuce Grown under Short-Term Preharvest Daytime or Nighttime Supplemental LEDs
Source: MDPI journal article supplement (doi:10.3390/plants11091123), 2022-04-21
Supplement: s1 [file s1]

**Table S1.** Effect of short-term daytime supplemental LEDs to HPS lighting on phenolic compounds content in lettuce cultivated in a greenhouse.

| Phenolic Compounds | HPS     | 400 nm  | 455 nm   | 455 + 530 nm | 530 nm  | 660 nm  |
|--------------------|---------|---------|----------|--------------|---------|---------|
| Caffeic a.         | 0.042 b | 0.036 b | 0.048 ab | 0.048 ab     | 0.016 b | 0.097 a |
| Chicoric a.        | 3.228 a | 3.747 a | 3.036 a  | 4.044 a      | 3.066 a | 2.347 a |
| Chlorogenic a.     | 0.927 a | 1.026 a | 1.071 a  | 1.101 a      | 0.747 a | 0.983 a |
| Gallic a.          | 0.039 a | 0.027 a | 0.028 a  | 0.026 a      | 0.023 a | 0.023 a |
| o-coumaric a.      | 0.090 a | 0.132 a | 0.049 a  | 0.047 a      | 0.044 a | 0.133 a |
| p-coumaric a       | 0.045 a | 0.034 a | 0.027 a  | 0.020 a      | 0.032 a | 0.019 a |
| Protocatechuic a.  | 0.124 a | 0.081 a | 0.077 a  | 0.048 a      | 0.090 a | 0.118 a |
| Rosmarinic a.      | 0.345 a | 0.336 a | 0.626 a  | 0.494 a      | 0.516 a | 0.317 a |
| Apigenin           | 0.588 a | 0.360 a | 0.541 a  | 0.251 a      | 0.548 a | 0.305 a |
| Epicatechin        | 0.222 a | 0.256 a | 0.103 a  | 0.139 a      | 0.117 a | 0.319 a |
| Kaempferol         | 0.027 a | 0.025 a | 0.020 a  | 0.023 a      | 0.029 a | 0.021 a |
| Myricetin          | 0.085 a | 0.062 a | 0.070 a  | 0.046 a      | 0.068 a | 0.046 a |
| Quercetin          | 0.033 a | 0.108 a | 0.020 a  | 0.107 a      | 0.043 a | 0.084 a |
| Rutin              | 0.034 b | 0.037 b | 0.036 b  | 0.038 b      | 0.018 b | 0.186 a |
| Total              | 5.827 a | 6.267 a | 5.753 a  | 6.432 a      | 5.355 a | 4.997 a |

Individual phenolic compound content is presented as mg g<sup>-1</sup> in dry plant matter. Means with different letters are significantly different at the  $p < 0.05$  level by Tukey's honestly significant difference test.

**Table S2.** Effect of different seasons on phenolic compounds content in lettuce cultivated in a greenhouse under short-term daytime supplemental LEDs to HPS.

| Phenolic Compounds | Spring  | Autumn  |
|--------------------|---------|---------|
| Caffeic a.         | 0.041 a | 0.055 a |
| Chicoric a.        | 2.339 b | 4.150 a |
| Chlorogenic a.     | 0.855 b | 1.096 a |
| Gallic a.          | 0.034 a | 0.021 b |
| o-coumaric a.      | 0.042 b | 0.123 a |
| p-coumaric a       | 0.042 a | 0.017 b |
| Protocatechuic a.  | 0.137 a | 0.042 b |
| Rosmarinic a.      | 0.655 a | 0.223 b |
| Apigenin           | 0.650 a | 0.215 b |
| Epicatechin        | 0.094 b | 0.292 a |
| Kaempferol         | 0.028 a | 0.021 b |
| Myricetin          | 0.086 a | 0.039 b |
| Quercetin          | 0.040 b | 0.091 a |
| Rutin              | 0.020 b | 0.096 a |
| Total              | 5.064 b | 6.480 a |

Individual phenolic compound content is presented as mg g<sup>-1</sup> in dry plant matter. Means with different letters are significantly different at the  $p < 0.05$  level by Tukey's honestly significant difference test.

**Table S3.** Effect of short-term nighttime supplemental LEDs to HPS lighting on phenolic compounds content in lettuce cultivated in a greenhouse.

| Phenolic Compounds | HPS      | 400 nm   | 455 nm  | 455 + 530 nm | 530 nm  | 660 nm  |
|--------------------|----------|----------|---------|--------------|---------|---------|
| Caffeic a.         | 0.129 a  | 0.130 a  | 0.144 a | 0.078 a      | 0.139 a | 0.094 a |
| Chicoric a.        | 2.376 a  | 1.401 a  | 1.865 a | 2.895 a      | 1.032 a | 1.011 a |
| Chlorogenic a.     | 1.847 ab | 1.770 ab | 1.188 b | 3.257 a      | 1.187 b | 1.403 b |
| Gallic a.          | 0.035 a  | 0.033 a  | 0.021 a | 0.031 a      | 0.026 a | 0.022 a |
| o-coumaric a.      | 0.247 a  | 0.213 a  | 0.053 a | 0.067 a      | 0.075 a | 0.051 a |
| p-coumaric a       | 0.013 a  | 0.024 a  | 0.015 a | 0.028 a      | 0.014 a | 0.021 a |
| Protocatechuic a.  | 0.111 a  | 0.072 a  | 0.057 a | 0.084 a      | 0.060 a | 0.092 a |
| Rosmarinic a.      | 0.052 a  | 0.369 a  | 0.580 a | 1.162 a      | 0.229 a | 0.388 a |
| Apigenin           | 0.200 a  | 0.239 a  | 0.150 a | 0.304 a      | 0.153 a | 0.129 a |
| Epicatechin        | 0.294 a  | 0.072 a  | 0.091 a | 0.106 a      | 0.279 a | 0.097 a |
| Kaempferol         | 0.007 a  | 0.008 a  | 0.009 a | 0.010 a      | 0.007 a | 0.016 a |
| Myricetin          | 0.029 a  | 0.039 a  | 0.023 a | 0.025 a      | 0.028 a | 0.018 a |
| Quercetin          | 0.015 a  | 0.011 a  | 0.011 a | 0.012 a      | 0.017 a | 0.014 a |
| Rutin              | 1.494 a  | 2.571 a  | 0.680 a | 1.741 a      | 1.266 a | 1.107 a |
| Total              | 6.849 ab | 6.953 ab | 4.886 b | 9.799 a      | 4.513 b | 4.463 b |

Individual phenolic compound content is presented as mg g<sup>-1</sup> in dry plant matter. Means with different letters are significantly different at the P < 0.05 level by Tukey's honestly significant difference test.

**Table S4.** Effect of different seasons on phenolic compounds content in lettuce cultivated in a greenhouse under short-term nighttime supplemental LEDs to HPS.

| Phenolic Compounds | Spring  | Autumn  |
|--------------------|---------|---------|
| Caffeic a.         | 0.198 a | 0.041 b |
| Chicoric a.        | 3.270 a | 0.257 b |
| Chlorogenic a.     | 2.392 a | 1.159 b |
| Gallic a.          | 0.039 a | 0.017 b |
| o-coumaric a.      | 0.096 a | 0.139 a |
| p-coumaric a       | 0.030 a | 0.008 b |
| Protocatechuic a.  | 0.139 a | 0.019 b |
| Rosmarinic a.      | 0.919 a | 0.008 b |
| Apigenin           | 0.361 a | 0.031 b |
| Epicatechin        | 0.247 a | 0.066 b |
| Kaempferol         | 0.016 a | 0.003 b |
| Myricetin          | 0.031 a | 0.023 a |
| Quercetin          | 0.022 a | 0.005 b |
| Rutin              | 0.076 b | 2.877 a |
| Total              | 7.836 a | 4.652 b |

Individual phenolic compound content is presented as mg g<sup>-1</sup> in dry plant matter. Means with different letters are significantly different at the P < 0.05 level by Tukey's honestly significant difference test.
